# Supplementary material for: An Ethnobotanical Investigation into the Traditional Uses of Mediterranean Medicinal and Aromatic Plants: The Case of Troodos Mountains in Cyprus
Source: MDPI journal article supplement (doi:10.3390/plants12051119), 2023-03-02
Supplement: s1 [file s1]

## Supplementary Material

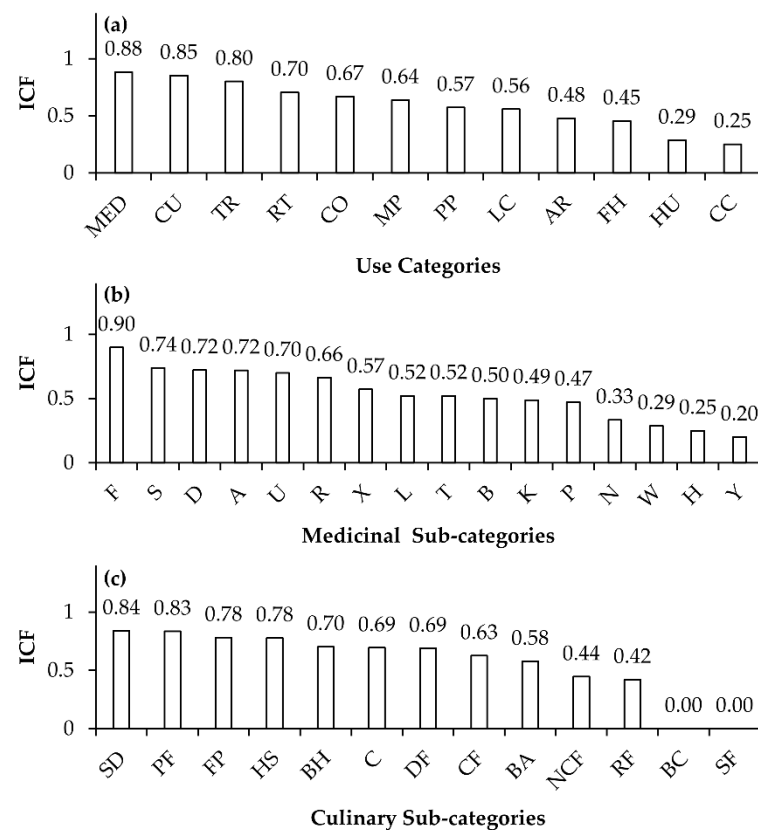

**Figure S1.** The Informant Consensus Factor (ICF) for the use categories\* (a), the medicinal\*\* (b), and culinary sub-categories\*\*\* (c). \*Use categories: Medicinal (MED), Culinary (CU), Livestock care (LC), cosmetics (CO), manufacture-processing (MP), religious traditions (RT), animal repellent (AR), crop care (CC), household use (HU), fishing-hunting (FH), trade (TR), poisonous plants (PP). \*\*Medicinal sub-categories (according to ICPC-2): Skin (S), digestive (D), general & unspecified (A), respiratory (R), eye (F), cardiovascular (K), urological (U), psychological (P), musculoskeletal (L), endocrine/metabolic & nutritional (T), pregnancy, childbearing (W), neurological (N), blood, blood forming organs and immune mechanism (B), female genital (X), male genital (Y), ear (H). \*\*\* Culinary sub-categories: Sweets & desserts (SD), food preservation (FP), herbs & spices, (HS), hot beverage (tea; BH), cooked food ingredient (CF), raw food (RF), alcoholic beverage (BA), non-cooked food ingredient (NCF), dried fruits (DF), condiment (other; C), pickled food (PF), cold beverage (BC), smoke flavoring (SF).

**Table S1.** The plant taxa, recorded in the present ethnobotanical study, are organized alphabetically by plant division, family, and genus. Information is provided on whether the taxa are indigenous or endemic [23] and whether are collected, cultivated, or imported according to the respondents, the vernacular names recorded, the use categories, the medicinal and culinary sub-categories in which their uses were classified, and their ranking according to the Cultural Value Index when calculated considering all, medicinal and culinary uses respectively. (--: no information, the abbreviations are clearly defined below the table\* and thoroughly explained in section 2.3.1).

| Taxon, Family, Indigenous (IN)/Endemic (EN), Collected (co)/cultivated (cu)/imported (im) | Vernacular name(s)                                                                                                   | Use Categories                  | CV Rank (All) | Med Sub-categories  | CV Rank (Med) | Cu Sub-categories         | CV Rank (Cu) |
|-------------------------------------------------------------------------------------------|----------------------------------------------------------------------------------------------------------------------|---------------------------------|---------------|---------------------|---------------|---------------------------|--------------|
| <b>Pteridophyta</b>                                                                       |                                                                                                                      |                                 |               |                     |               |                           |              |
| <i>Pteridium aquilinum</i> (L.) Kuhn, Dennstaedtiaceae, IN, co                            | Fteritzin                                                                                                            | MED                             | 122           | S                   | 78            |                           |              |
| <i>Equisetum</i> spp., Equisetaceae, IN, co                                               | Polykompi                                                                                                            | MED, CC                         | 90            | A, L, S, T, U       | 47            |                           |              |
| <i>Adiantum capillus-veneris</i> L., Pteridaceae, IN, co                                  | Polytrichi, skorpidi                                                                                                 | MED                             | 108           | S                   | 67            |                           |              |
| <b>Spermatophyta</b>                                                                      |                                                                                                                      |                                 |               |                     |               |                           |              |
| <i>Sambucus nigra</i> L., Adoxaceae, --, co/cu                                            | Zampoukos, koufoxylia                                                                                                | MED, CU, CC                     | 9             | A, D, F, K, P, R, S | 2             | BC, BH                    | 29           |
| <i>Amaranthus</i> spp., Amaranthaceae, --, co                                             | Glintos                                                                                                              | CU                              | 122           |                     |               | CF                        | 71           |
| <i>Allium ampeloprasum</i> L., Amaryllidaceae, IN, co                                     | Skouraththa, agrio prasso                                                                                            | CU, LC                          | 69            |                     |               | CF                        | 51           |
| <i>Allium cepa</i> L., Amaryllidaceae, --, cu                                             | Kremmydi                                                                                                             | MED, CU, RT, MP                 | 15            | L, R, S             | 19            | CF, FP, RF                | 34           |
| <i>Allium sativum</i> L., Amaryllidaceae, --, cu                                          | Skordos, skortos, skordo                                                                                             | MED, CU, AR, CC                 | 38            | A, D, H, K, N       | 29            | FP                        | 64           |
| <i>Pistacia</i> spp., Anacardiaceae, IN, co/im                                            | Mastichodentro, ssinia, ssinos ( <i>P. lentiscus</i> ) ; tremithkia, trimithkia, tremithia ( <i>P. terebinthus</i> ) | MED, CU, LC, Co, MP, HU, CC, TR | 3             | A, D, S             | 28            | C, DF, CF, FP, PF, RF, HS | 2            |
| <i>Rhus coriaria</i> L., Anacardiaceae, IN, co                                            | Roudin, routhkia, soumatzin, soumaki                                                                                 | MED, CU, LC, Co, MP, CC, FH, TR | 4             | A, D, S             | 31            | HS                        | 33           |
| <i>Anethum graveolens</i> L., Apiaceae, --, cu                                            | Anithos, anitho                                                                                                      | CU                              | 122           |                     |               | BA                        | 71           |
| <i>Apium graveolens</i> L., Apiaceae, IN, cu                                              | Sellino, selleno                                                                                                     | MED, CU                         | 81            | B                   | 78            | CF, FP                    | 60           |
| <i>Coriandrum sativum</i> L., Apiaceae, --, cu                                            | Koliantros                                                                                                           | CU                              | 48            |                     |               | FP                        | 23           |
| <i>Cuminum cyminum</i> L., Apiaceae, --, cu/im                                            | Artisia                                                                                                              | CU                              | 92            |                     |               | FP, HS                    | 44           |
| <i>Eryngium creticum</i> Lam., Apiaceae, IN, co                                           | Pagkallos, magkallos                                                                                                 | CU                              | 89            |                     |               | CF, PF                    | 42           |
| <i>Foeniculum vulgare</i> Mill., Apiaceae, IN, co                                         | Maratho, marathos                                                                                                    | MED, CU                         | 31            | A, D, P, U          | 37            | BH, CF, FP, HS, SD        | 6            |
| <i>Helosciadium nodiflorum</i> (L.) W. D. J. Koch, Apiaceae, IN, co                       | Sellinou tou potamou, arkoselleno                                                                                    | CU                              | 122           |                     |               | NCF                       | 71           |
| <i>Petroselinum crispum</i> (Mill.) A. W. Hill, Apiaceae, --, cu                          | Maitanos                                                                                                             | CU                              | 108           |                     |               | HS                        | 64           |
| <i>Pimpinella anisum</i> L., Apiaceae, --, cu/im                                          | Glykaniso, glykanisos                                                                                                | MED, CU                         | 30            | A, D, R             | 25            | BA, BH                    | 30           |

|                                                                                         |                                                                                     |                     |     |                        |     |             |    |
|-----------------------------------------------------------------------------------------|-------------------------------------------------------------------------------------|---------------------|-----|------------------------|-----|-------------|----|
| <i>Smyrniolus sativum</i> L., Apiaceae, IN, co                                          | Arkoselleno                                                                         | CU                  | 122 |                        |     | CF          | 71 |
| <i>Nerium oleander</i> L., Apocynaceae, IN, co                                          | Arodafni, pikrodafni                                                                | MED, PP             | 85  | S                      | 67  |             |    |
| <i>Hedera pastuchovii</i> subsp. <i>cypria</i> (McAllister) Hand, Araliaceae, EN, co    | Kissos                                                                              | MED                 | 108 | S                      | 67  |             |    |
| <i>Asparagus acutifolius</i> L., Asparagaceae, IN, co                                   | Agrellin, agrellia                                                                  | CU                  | 95  |                        |     | CF          | 55 |
| <i>Drimys paphnitis</i> (Forssk.) J. C. Manning & Goldblatt, Asparagaceae, IN, co       | Avrossillos, avrossilla, skylla, skyllokremmyda, vavitsa                            | MED, LC, MP, AR, PP | 41  | K, S                   | 41  |             |    |
| <i>Ruscus aculeatus</i> L., Asparagaceae, IN, co                                        | --                                                                                  | MED                 | 122 | L                      | 78  |             |    |
| <i>Achillea</i> spp., Asteraceae, --, co                                                | Achilleia                                                                           | MED                 | 90  | A, K, X                | 42  |             |    |
| <i>Artemisia arbuscula</i> L., Asteraceae, --, co                                       | Genia tou gerou                                                                     | MED                 | 108 | A, D                   | 59  |             |    |
| <i>Calendula officinalis</i> L., Asteraceae, --, cu                                     | Katifes, kalentoula                                                                 | MED, AR             | 81  | K, S                   | 59  |             |    |
| <i>Carthamus tinctorius</i> L., Asteraceae, --, cu                                      | Zacharas, zafaras                                                                   | CU                  | 78  |                        |     | HS          | 47 |
| <i>Cichorium intybus</i> L., Asteraceae, IN, co                                         | Kichorio, agrio radiki                                                              | MED                 | 122 | T                      | 78  |             |    |
| <i>Cynara</i> spp., Asteraceae, IN, co                                                  | Agrioagkinara ( <i>C. cornigera</i> ), chosti ( <i>C. cardunculus</i> ), aplostarka | MED, CU             | 50  | D, K                   | 51  | CF, RF      | 36 |
| <i>Dittrichia viscosa</i> subsp. <i>angustifolia</i> (Bég.) Greuter, Asteraceae, IN, co | Konyzos                                                                             | MED, LC, AR, CC     | 28  | A, K, P, R, S          | 21  |             |    |
| <i>Echinops spinosissimus</i> Turra, Asteraceae, IN, co                                 | Kefalagkathos, kamilagkathos                                                        | MED, CU, LC         | 80  |                        | 105 | RF          | 71 |
| <i>Glebionis coronaria</i> (L.) Spach, Asteraceae, IN, co                               | Similoudin, kitrini margarita, papouna, lazarus, agrio sellino                      | MED, CU, RT, MP     | 33  | R                      | 76  | CF, RF      | 44 |
| <i>Helichrysum italicum</i> (Roth) Don, Asteraceae, IN, co                              | Psyllina, psyllida                                                                  | MED, CU, HU, CC     | 47  | S                      | 78  | BA, FP      | 48 |
| <i>Matricaria chamomilla</i> L., Asteraceae, IN, co                                     | Chamomili, mougiokhorto, papouna                                                    | MED, CU, Co, AR     | 24  | A, D, F, K, P, R, S, X | 12  | BH          | 55 |
| <i>Onopordum cyprium</i> Eig, Asteraceae, EN, co                                        | Gaidouragkatho                                                                      | MED                 | 76  | D                      | 50  |             |    |
| <i>Sonchus oleraceus</i> L., Asteraceae, IN, co                                         | Galatouna                                                                           | MED, CU             | 99  | D                      | 78  | CF          | 71 |
| <i>Tanacetum balsamita</i> L., Asteraceae, --, co                                       | Valsamo                                                                             | MED                 | 105 | A, N, S                | 53  |             |    |
| <i>Taraxacum</i> spp., Asteraceae, --, co                                               | Agrioradiko                                                                         | MED, CU             | 64  | D, U                   | 54  | NCF         | 70 |
| <i>Berberis cretica</i> L., Berberidaceae, IN, co                                       | Ververissia, agkathovatos                                                           | CU, MP              | 99  |                        |     | RF          | 71 |
| <i>Corylus</i> spp., Betulaceae, --, cu                                                 | Fountoukia                                                                          | CU                  | 122 |                        |     | RF          | 71 |
| <i>Anchusa azurea</i> Mill., Boraginaceae, IN, co                                       | Vouglosson, mouglosson                                                              | MED, CU             | 99  | D                      | 78  | CF          | 71 |
| <i>Brassica oleracea</i> var. <i>botrytis</i> , Brassicaceae, --, cu                    | Kounouppidi                                                                         | CU                  | 122 |                        |     | CF          | 71 |
| <i>Nasturtium officinale</i> W. T. Aiton, Brassicaceae, IN, co                          | Kardamilla, kartamilla, kardamo, nerokardamo                                        | CU                  | 71  |                        |     | CF, NCF, RF | 28 |
| <i>Sinapis alba</i> L., Brassicaceae, IN, co                                            | Lapsana                                                                             | CU, LC              | 81  |                        |     | CF, NCF     | 60 |
| <i>Opuntia ficus-indica</i> (L.) Mill., Cactaceae, --, co                               | Papoutsosytzia                                                                      | MED, MP             | 81  | S                      | 78  |             |    |
| <i>Cannabis sativa</i> L., Cannabaceae, --, cu                                          | Kannaourin                                                                          | CU                  | 108 |                        |     | RF, HS      | 60 |
| <i>Capparis spinosa</i> L., Capparaceae, IN, co                                         | Kapparka, kappari                                                                   | CU, LC              | 52  |                        |     | PF, RF      | 27 |
| <i>Silene vulgaris</i> (Moench) Garcke, Caryophyllaceae, IN, co                         | Strouthkia, stroufouthkia, tsakrithkia                                              | CU                  | 57  |                        |     | CF, NCF     | 22 |

|                                                                                              |                                                 |                         |     |                           |    |                |    |
|----------------------------------------------------------------------------------------------|-------------------------------------------------|-------------------------|-----|---------------------------|----|----------------|----|
| <i>Cistus</i> spp., Cistaceae, --, co                                                        | Xistarka, ladanía, katsarka                     | MED, CU, LC, Co, HU, TR | 8   | A, D, K, N, P, R, S, T, Y | 7  | BH, FP, SF     | 15 |
| <i>Citrullus lanatus</i> (Thunb.) Mansf., Cucurbitaceae, --, cu                              | Karpouzia                                       | CU                      | 122 |                           |    | SD             | 71 |
| <i>Cucurbita moschata</i> Duch., Cucurbitaceae, --, cu                                       | Kotsinokoloko                                   | CU                      | 122 |                           |    | SD             | 71 |
| <i>Cucurbita pepo</i> L., Cucurbitaceae, --, cu                                              | Kolokythia                                      | MED, CU                 | 77  | A, N,                     | 55 | SD             | 71 |
| <i>Ecballium elaterium</i> (L.) A. Rich, Cucurbitaceae, IN, co                               | Pikrangouria                                    | MED                     | 122 | A                         | 78 |                |    |
| <i>Cupressus sempervirens</i> L., Cupressaceae, IN, co                                       | Kyparissi                                       | MED                     | 122 | S                         | 78 |                |    |
| <i>Juniperus</i> spp., Cupressaceae, IN, co                                                  | Aoratos                                         | LC, AR                  | 99  |                           |    |                |    |
| <i>Cytinus hypocistis</i> (L.) L., Cytinaceae, IN, co                                        | Mitzilia, vizilia, vizinia                      | CU                      | 95  |                           |    | RF             | 55 |
| <i>Elaeagnus angustifolia</i> L., Elaeagnaceae, --, co                                       | Zizifia                                         | MED, CU                 | 58  | R                         | 63 | RF             | 51 |
| <i>Arbutus andrachne</i> L., Ericaceae, IN, co                                               | Antrouklia, koumaria                            | MED, CU, LC, FH         | 36  | A, P                      | 59 | BA, RF, SD     | 31 |
| <i>Euphorbia veneris</i> M. S. Khan, Euphorbiaceae, EN, co                                   | Tsounna                                         | FH                      | 122 |                           |    |                |    |
| <i>Acacia saligna</i> (Labill.) H. Wendl., Fabaceae, --, co                                  | Akakia                                          | LC                      | 122 |                           |    |                |    |
| <i>Ceratonia siliqua</i> L., Fabaceae, IN, cu                                                | Teratsia, charoupia                             | MED, CU, HU             | 60  | R,                        | 67 | BA, SF         | 64 |
| <i>Cicer arietinum</i> L., Fabaceae, --, cu                                                  | Revithi                                         | CU                      | 122 |                           |    | CF             | 71 |
| <i>Erophaca baetica</i> subsp. <i>orientalis</i> (Chater & Meikle) Podlech, Fabaceae, IN, co | Pifanis, pellopifanos, arkokoutzia, agriokoukia | LC, PP                  | 66  |                           |    |                |    |
| <i>Glycyrrhiza glabra</i> L., Fabaceae, IN, co                                               | Glykoriza                                       | MED                     | 122 | D                         | 78 |                |    |
| <i>Lens culinaris</i> Medik., Fabaceae, --, cu                                               | Fatzii                                          | CU                      | 122 |                           |    | CF             | 71 |
| <i>Pisum sativum</i> L., Fabaceae, IN, cu                                                    | Pizeli                                          | LC                      | 122 |                           |    |                |    |
| <i>Vicia dalmatica</i> A. Kern., Fabaceae, IN, cu                                            | Mavrassieron                                    | MED, CU, LC, CC         | 39  | D                         | 78 | BH             | 71 |
| <i>Vicia ervilia</i> (L.) Willd., Fabaceae, IN, cu                                           | Rovi, rovassiero                                | LC                      | 108 |                           |    |                |    |
| <i>Vicia faba</i> L., Fabaceae, --, cu                                                       | Koutzia                                         | LC                      | 122 |                           |    |                |    |
| <i>Castanea sativa</i> Mill., Fagaceae, --, cu                                               | Kastania                                        | CU                      | 122 |                           |    | RF             | 71 |
| <i>Quercus alnifolia</i> Poech, Fagaceae, EN, co                                             | Latzia                                          | MED, CU, LC, MP, FH     | 40  | W                         | 78 | CF             | 71 |
| <i>Quercus coccifera</i> subsp. <i>calliprinos</i> (Webb) Holmboe, Fagaceae, IN, co          | Pernia                                          | MED, CU, LC, MP         | 67  | S                         | 78 | RF             | 71 |
| <i>Quercus infectoria</i> subsp. <i>veneris</i> (A. Kern.) Meikle, Fagaceae, IN, co          | Valanidia, drys                                 | CU, LC, HU              | 49  |                           |    | RF             | 71 |
| <i>Geranium tuberosum</i> L., Geraniaceae, IN, co                                            | Pirpillina                                      | CU                      | 122 |                           |    | RF             | 71 |
| <i>Pelargonium graveolens</i> (Thunb.) L'Hér., Geraniaceae, --, cu                           | Kiouli, armparoriza                             | MED, CU, RT             | 26  | K, P, S, W                | 40 | BH, FP, HS, SD | 7  |
| <i>Hypericum perforatum</i> L., Hypericaceae, IN, co/cu                                      | Yperiko, spathochorto, valsamochorto, valsamo   | MED, CU, Co, CC         | 20  | A, D, K, L, N, P, S, Y    | 9  | BH             | 71 |

|                                                                                         |                                                                                            |                             |     |                     |     |                     |    |
|-----------------------------------------------------------------------------------------|--------------------------------------------------------------------------------------------|-----------------------------|-----|---------------------|-----|---------------------|----|
| <i>Juglans regia</i> L., Juglandaceae, --, cu                                           | Karydia, karythkia                                                                         | MED, CU, LC, Co, MP         | 16  | D, K, R, S, W       | 24  | RF, SD              | 34 |
| <i>Calamintha incana</i> (Sm.) Benth., Lamiaceae, IN, co                                | Glifoni                                                                                    | MED                         | 122 | S                   | 78  |                     |    |
| <i>Lavandula angustifolia</i> Mill., Lamiaceae, --, cu                                  | Levanta                                                                                    | MED, CU, Co, RT, AR, HU, CC | 14  | A, D, L, N, P, S    | 20  | BH                  | 55 |
| <i>Lavandula stoechas</i> L., Lamiaceae, IN, co                                         | Myrofora, agria levanta                                                                    | LC, RT                      | 108 |                     |     |                     |    |
| <i>Melissa officinalis</i> L., Lamiaceae, IN, co                                        | Melissochorto                                                                              | MED, CU, LC                 | 55  | B, K, P, S          | 36  | BH                  | 71 |
| <i>Mentha aquatica</i> L., Lamiaceae, IN, co                                            | Vasilikodyosmos, fliskouni                                                                 | MED                         | 122 |                     | 105 |                     |    |
| <i>Mentha longifolia</i> subsp. <i>cyprica</i> (Heinr. Braun) Harley, Lamiaceae, EN, co | Potamoeitanos, potamogeitonas, agria menta                                                 | MED, CU, Co, AR             | 23  | A, D, N, P          | 27  | BH, NCF, FP, RF, HS | 12 |
| <i>Mentha spicata</i> L., Lamiaceae, IN, cu                                             | Dkyosmis, dyosmos                                                                          | MED, CU, HU                 | 7   | A, D, N, P, S       | 8   | BH, NCF, FP, HS     | 3  |
| <i>Mentha</i> x <i>Piperita</i> L., Lamiaceae, --, cu                                   | Menta                                                                                      | MED                         | 122 | D                   | 78  |                     |    |
| <i>Micromeria chionistrae</i> Meikle, Lamiaceae, EN, co                                 | --                                                                                         | Co                          | 122 |                     |     |                     |    |
| <i>Ocimum basilicum</i> L., Lamiaceae, --, cu                                           | Vasilikos, vasilitzia                                                                      | MED, CU, RT, AR, HU, CC     | 22  | D, N, P, R, S       | 33  | BH, NCF, HS, SD     | 25 |
| <i>Origanum dubium</i> Boiss., Lamiaceae, nEN, co/cu                                    | Rigani, rigani tou Kampou                                                                  | MED, CU, LC, Co, CC         | 11  | A, D, L, R, S, U    | 6   | BH, FP, HS          | 9  |
| <i>Origanum majorana</i> var. <i>tenuifolium</i> Weston, Lamiaceae, EN, co              | Sapsisia, matzourana                                                                       | MED, CU, Co, MP             | 34  | A, D, L, R, S, U, W | 32  | FP, HS              | 51 |
| <i>Rosmarinus officinalis</i> L., Lamiaceae, IN, co/cu                                  | Lasmaris, lasmari, dentrolivano                                                            | MED, CU, LC, Co, RT, AR     | 6   | A, D, K, P, S, T, W | 15  | BH, FP, HS          | 5  |
| <i>Salvia</i> spp., Lamiaceae, IN, co                                                   | Aspatzia, spatzia, chachomilia, faskomilo                                                  | MED, CU, Co, RT, AR         | 12  | A, D, K, L, P, R, W | 10  | BH, FP, RF          | 9  |
| <i>Sideritis</i> spp., Lamiaceae, IN, co                                                | <i>Sideritis</i> ( <i>S. perfoliata</i> ); Kypriakos <i>sideritis</i> ( <i>S. cypria</i> ) | MED                         | 108 | B                   | 67  |                     |    |
| <i>Thymbra capitata</i> (L.) Cav., Lamiaceae, IN, co                                    | Throumpi, thymari                                                                          | MED, CU, LC, MP, HU         | 27  | A, D, R, S          | 39  | BA, BH, HS          | 19 |
| <i>Vitex agnus-castus</i> L., Lamiaceae, IN, co                                         | Lygaria, agnia                                                                             | MED, MP                     | 92  | W, X                | 67  |                     |    |
| <i>Cinnamomum verum</i> J.Presl, Lauraceae, --, im                                      | Kanella                                                                                    | MED, CU                     | 53  | K                   | 78  | BH, FP, HS, SD      | 17 |
| <i>Laurus nobilis</i> L., Lauraceae, IN, co/cu                                          | Dafni                                                                                      | MED, CU, Co, AR, HU, PP     | 5   | A, N, R, S, T, W    | 17  | FP, HS              | 8  |
| <i>Punica granatum</i> L., Lythraceae, --, cu                                           | Rodia, rothkia                                                                             | MED, MP                     | 61  | D, P, S             | 49  |                     |    |
| <i>Malva sylvestris</i> L., Malvaceae, IN, co                                           | Molocha, althea                                                                            | MED, CU                     | 56  | A, D, R, S          | 34  | CF                  | 63 |
| <i>Ficus carica</i> L., Moraceae, IN, co/cu                                             | Sytzia, sykia                                                                              | MED, CU                     | 31  | A, D, R, S          | 23  | DF, FP, HS, SD      | 17 |
| <i>Morus alba</i> L., Moraceae, --, co/cu                                               | Sykamia, sykaminia                                                                         | LC                          | 85  |                     |     |                     |    |
| <i>Eucalyptus</i> spp., Myrtaceae, --, co                                               | Efkalyptos                                                                                 | MED, Co                     | 34  | A, R, W             | 22  |                     |    |
| <i>Myrtus communis</i> L., Myrtaceae, IN, co                                            | Mersinia, mersini                                                                          | MED, CU, LC, Co, RT, FH     | 13  | A, R, S, W          | 11  | RF                  | 51 |
| <i>Syzygium aromaticum</i> (L.) Merr. & L.M.Perry, Myrtaceae, --, im                    | Moschokarfi, garyfallo                                                                     | MED, CU                     | 61  | D, K                | 59  | FP, SD              | 41 |

|                                                                             |                                                                                    |                     |     |                        |     |                    |    |
|-----------------------------------------------------------------------------|------------------------------------------------------------------------------------|---------------------|-----|------------------------|-----|--------------------|----|
| <i>Olea europaea</i> L., Oleaceae, IN, cu                                   | Elia, agrielia                                                                     | MED, CU, LC, Co, RT | 10  | A, D, F, H, K, P, R, S | 3   | C, CF              | 48 |
| <i>Oxalis pes-caprae</i> L., Oxalidaceae, --, co                            | Xinouidi                                                                           | CU                  | 122 |                        |     | RF                 | 71 |
| <i>Papaver rhoeas</i> subsp. <i>rhoeas</i> , Papaveraceae, IN, co           | Paparouna, peteinos, kopela                                                        | CU, RT, MP          | 75  |                        |     | CF                 | 71 |
| <i>Papaver somniferum</i> L., Papaveraceae, --, co                          | Chaskasin                                                                          | MED                 | 95  | P                      | 57  |                    |    |
| <i>Sesamum indicum</i> L., Pedaliaceae, --, cu                              | Sisami                                                                             | CU                  | 64  |                        |     | NCF, HS, SD        | 21 |
| <i>Cedrus brevifolia</i> (Hook. f.) A. Henry, Pinaceae, EN, co              | Kedro                                                                              | MED                 | 122 | R                      | 78  |                    |    |
| <i>Pinus</i> spp., Pinaceae, IN, co                                         | Pefkos                                                                             | MED, CU, MP         | 43  | R, S                   | 45  | SD                 | 71 |
| <i>Piper nigrum</i> L., Piperaceae, , im                                    | Artymata, piperi, mavro piperi                                                     | MED, CU             | 53  | A                      | 67  | FP                 | 42 |
| <i>Plantago coronopus</i> L., Plantaginaceae, IN, co                        | Lithospastos, lithospasto                                                          | MED                 | 73  | U                      | 47  |                    |    |
| <i>Plantago lanceolata</i> L., Plantaginaceae, IN, co                       | --                                                                                 | MED                 | 119 | R, S                   | 67  |                    |    |
| <i>Plantago major</i> L., Plantaginaceae, IN, co                            | Pentanevro, lithospastos                                                           | MED, CU             | 58  | S, U, W                | 35  | NCF                | 71 |
| <i>Platanus orientalis</i> L., Platanaceae, IN, co                          | Platanos                                                                           | MED                 | 122 | S                      | 78  |                    |    |
| <i>Cynodon dactylon</i> (L.) Pers., Poaceae, IN, co                         | Arkasto. erkastos, lithospasto                                                     | MED                 | 105 | U                      | 63  |                    |    |
| <i>Oryza sativa</i> L., Poaceae, --, im                                     | Ryzi                                                                               | MED                 | 122 | D                      | 78  |                    |    |
| <i>Triticum turgidum</i> subsp. <i>durum</i> (Desf.) Husn., Poaceae, --, cu | Sitari                                                                             | CU                  | 85  |                        |     | CF, FP, SD         | 36 |
| <i>Zea mays</i> L., Poaceae, --, cu                                         | Sitaropoula                                                                        | MED                 | 119 | U                      | 76  |                    |    |
| <i>Portulaca oleracea</i> L., Portulacaceae, IN, co                         | Glystirida, antrakla                                                               | MED                 | 122 | T                      | 78  |                    |    |
| <i>Nigella sativa</i> L., Ranunculaceae, --, cu                             | Mavrokokkos                                                                        | CU                  | 122 |                        |     | HS                 | 71 |
| <i>Rhamnus alaternus</i> L., Rhamnaceae, IN, co                             | Chrysoxyliia                                                                       | CU, MP              | 92  |                        |     | BA                 | 71 |
| <i>Agrimonia eupatoria</i> L., Rosaceae, IN, co                             | Agrimonio, fonochorto                                                              | MED                 | 122 | R                      | 78  |                    |    |
| <i>Crataegus</i> spp., Rosaceae, IN, co/cu                                  | Mosfilia ( <i>C. azarolus</i> ), kotzinomosfilia ( <i>C. monogyna</i> ), krataigos | MED, CU, CC         | 18  | A, D, K, N, T, Y       | 13  | BH, RF, SD         | 13 |
| <i>Cydonia oblonga</i> Mill., Rosaceae, --, cu                              | Kydonia                                                                            | MED, CU             | 29  | D, N                   | 30  | BA, DF, SD         | 11 |
| <i>Malus domestica</i> Borkh., Rosaceae, --, cu                             | Milia                                                                              | MED, CU             | 43  | A, R, S, T             | 52  | BA, DF, SD         | 15 |
| <i>Mespilus germanica</i> L., Rosaceae, --, cu                              | Pomilithkia                                                                        | CU                  | 108 |                        |     | RF                 | 64 |
| <i>Prunus armeniaca</i> L., Rosaceae, --, cu                                | Chrysomilia                                                                        | CU                  | 122 |                        |     | SD                 | 71 |
| <i>Prunus avium</i> L., Rosaceae, --, cu                                    | Kerasia                                                                            | MED, CU, MP,        | 17  | A, D, K, R, U, X, Y    | 5   | BA, BC, BH, RF, SD | 14 |
| <i>Prunus cerasus</i> L., Rosaceae, --, cu                                  | Vyssinia                                                                           | MED                 | 122 |                        | 105 |                    |    |
| <i>Prunus domestica</i> L., Rosaceae, --, cu                                | Damaskinia                                                                         | MED, CU             | 73  | D                      | 55  | BA                 | 71 |
| <i>Prunus domestica</i> subsp. <i>syriaca</i> , Rosaceae, --, cu            | Marapellia                                                                         | CU                  | 95  |                        |     | RF, SD             | 48 |
| <i>Prunus dulcis</i> (Mill.) D. A. Webb, Rosaceae, --, cu                   | Amygdalia, athasia                                                                 | MED, CU, LC, Co     | 21  | A, D, R, S, W          | 18  | BA, CF, SD         | 26 |
| <i>Prunus mahaleb</i> L., Rosaceae, --, im                                  | Kerasia, agriokerasia                                                              | CU                  | 108 |                        |     | HS                 | 64 |
| <i>Prunus persica</i> (L.) Batsch, Rosaceae, --, cu                         | Rodakinia                                                                          | MED, CU             | 67  | D,                     | 78  | DF, RF, SD         | 39 |
| <i>Pyrus communis</i> L., Rosaceae, --, cu                                  | Achladia, appidkia                                                                 | MED, CU             | 72  | D                      | 78  | SD                 | 55 |

|                                                          |                                                                                                                                                                                  |                             |     |                           |     |                               |    |
|----------------------------------------------------------|----------------------------------------------------------------------------------------------------------------------------------------------------------------------------------|-----------------------------|-----|---------------------------|-----|-------------------------------|----|
| <i>Rosa damascena</i> Mill., Rosaceae, --, cu            | Triantafyllia i damaskini, triantafyllia tou Agrou                                                                                                                               | MED, CU, LC, Co, RT         | 2   | D, F, L, P, S, W          | 4   | HS, SD                        | 4  |
| <i>Rosa</i> spp., Rosaceae, IN, co                       | Arkotriantafyllia, agria triantafyllia, atzoulovatos, kynorodo, pemperissia, rodi tou Troodous ( <i>R. micrantha</i> subsp. <i>Chionistrae</i> ), mousietia ( <i>R. canina</i> ) | MED, CU, Co, CC             | 25  | A, D, L, R, S, T, U, Y    | 16  | BA, BH, RF, SD                | 36 |
| <i>Rubus sanctus</i> Schreb., Rosaceae, IN, co           | Vatos, imeros vatos, vramos, vatouria, mouria                                                                                                                                    | MED, CU                     | 37  | A, B, D, F, T             | 26  | BH, RF                        | 32 |
| <i>Cinchona officinalis</i> L., Rubiaceae, --, im        | Kinino                                                                                                                                                                           | MED                         | 122 | A                         | 78  |                               |    |
| <i>Citrus × aurantium</i> L., Rutaceae, --, cu           | kitromilia                                                                                                                                                                       | CU, Co                      | 51  |                           |     | C, FP, SD                     | 24 |
| <i>Citrus × sinensis</i> (L.) Osbeck, Rutaceae, --, cu   | Portokalia                                                                                                                                                                       | MED, CU                     | 99  |                           | 105 | SD                            | 71 |
| <i>Citrus limon</i> (L.) Osbeck, Rutaceae, --, cu        | Lemonia                                                                                                                                                                          | MED, CU, Co                 | 46  | D, K, P, R                | 37  | C, FP                         | 44 |
| <i>Ruta chalepensis</i> L., Rutaceae, IN, co             | Apiganos                                                                                                                                                                         | MED, AR                     | 108 |                           | 105 |                               |    |
| <i>Aesculus hippocastanum</i> L., Sapindaceae, --, cu    | Agriokastania                                                                                                                                                                    | MED                         | 122 |                           | 105 |                               |    |
| <i>Verbascum sinuatum</i> L., Scrophulariaceae, IN, co   | Flomos                                                                                                                                                                           | MED, FH                     | 85  | H, R                      | 63  |                               |    |
| <i>Capsicum annuum</i> L., Solanaceae, --, cu            | Piperia                                                                                                                                                                          | MED                         | 119 | S, W                      | 67  |                               |    |
| <i>Capsicum frutescens</i> L., Solanaceae, --, cu        | Kokkino kaftero piperi, kafteri piperia, piperouthkia apsera                                                                                                                     | MED, CU, LC                 | 42  | A, S                      | 46  | FP, HS                        | 40 |
| <i>Lycopersicon esculentum</i> Mill., Solanaceae, --, cu | Tomata, ntomata                                                                                                                                                                  | MED, CU                     | 69  | S                         | 57  | CF                            | 64 |
| <i>Solanum tuberosum</i> L., Solanaceae, --, cu          | Patata                                                                                                                                                                           | MED, LC                     | 61  | A, S                      | 43  |                               |    |
| <i>Styrax officinalis</i> L., Styracaceae, IN, co        | Steratzia, tsounna                                                                                                                                                               | CU, Co, RT, FH              | 45  |                           |     | SD                            | 71 |
| <i>Urtica</i> spp., Urticaceae, IN, co                   | Tsouknida, tsouknitha, tsiknitta                                                                                                                                                 | MED, CU, LC, CC             | 19  | B, D, K, L, R, T, U, W    | 14  | BH, CF, NCF, HS               | 20 |
| <i>Aloysia citrodora</i> Palau, Verbenaceae, --, cu      | Alouiza                                                                                                                                                                          | MED                         | 122 | T                         | 78  |                               |    |
| <i>Viola odorata</i> L., Violaceae, IN, co               | Violetta                                                                                                                                                                         | CU                          | 122 |                           |     | BA                            | 71 |
| <i>Vitis vinifera</i> L., Vitaceae, --, cu               | Ampeli                                                                                                                                                                           | MED, CU, LC, Co, RT, HU, CC | 1   | A, D, F, K, L, N, R, S, W | 1   | BA, BH, C, DF, CF, FP, RF, SD | 1  |
| <i>Aloe vera</i> (L.) Burm. f., Xanthorrhoeaceae, --, cu | Aloi                                                                                                                                                                             | MED                         | 105 | S                         | 63  |                               |    |
| <i>Asphodelus ramosus</i> L., Xanthorrhoeaceae, IN, co   | Spouthoulla                                                                                                                                                                      | MED                         | 78  | H, S                      | 43  |                               |    |
| <i>Tribulus terrestris</i> L., Zygophyllaceae, IN, co    | Trivoli                                                                                                                                                                          | MED, LC                     | 99  | U                         | 78  |                               |    |

\*Use categories: Medicinal (MED), Culinary (CU), Livestock care (LC), cosmetics (CO), manufacture-processing (MP), religious traditions (RT), animal repellent (AR), crop care (CC), household use (HU), fishing-hunting (FH), trade (TR), poisonous plants (PP). Medicinal sub-categories (according to ICPC-2): Skin (S), digestive (D), general & unspecified (A), respiratory (R), eye (F), cardiovascular (K), urological (U), psychological (P), musculoskeletal (L), endocrine/metabolic & nutritional (T), pregnancy, childbearing (W), neurological (N), blood, blood forming organs and immune mechanism (B), female genital (x), male genital (Y), ear (H). Culinary sub-categories: Sweets & desserts (SD), food preservation (FP), herbs & spices, (HS), hot beverage (tea; BH), cooked food ingredient (CF), raw food (RF), alcoholic beverage (BA), non-cooked food ingredient (NCF), dried fruits (DF), condiment (other; C), pickled food (PF), cold beverage (BC), smoke flavoring (SF).

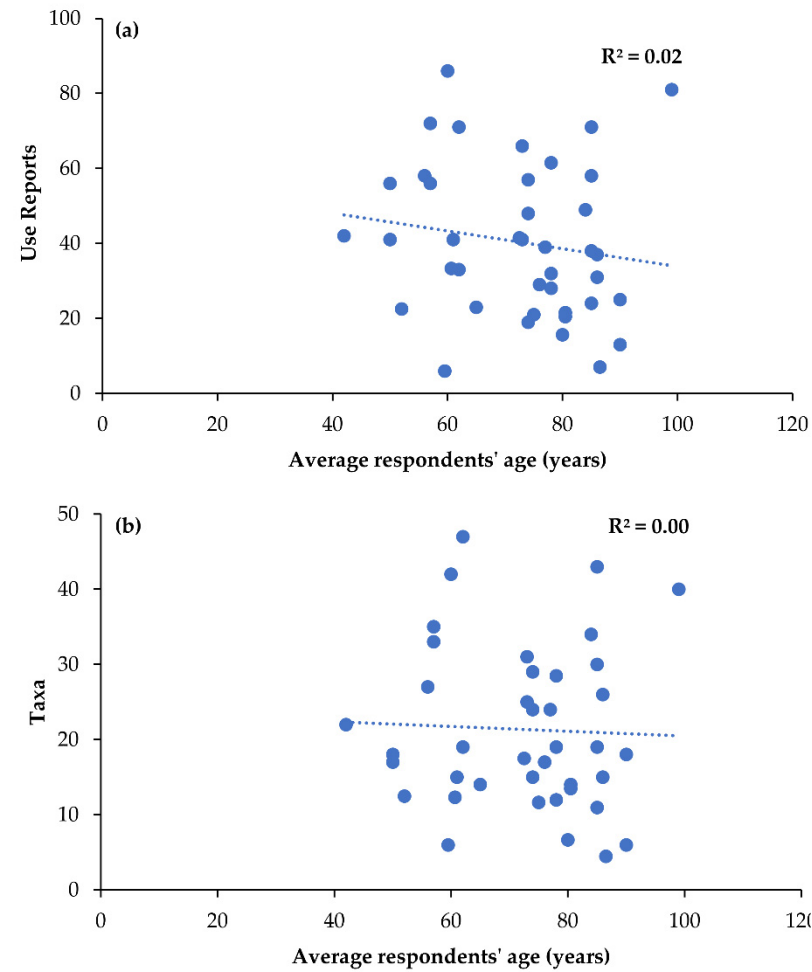

**Figure S2.** (a) The relationship between the average use reports (i.e. use reports mentioned by a group divided by the number of respondents) mentioned by each group of respondents and the average age of the respondents within a group. (b) The relationship between the average number of taxa (i.e. number of taxa mentioned by a group divided by the number of respondents) mentioned by each group of respondents and the average age of the respondents within the group.
